# Supplementary material for: Argentina: pais receptor? Aproximacion a un fenomeno migratorio reciente.
Source: Royal Society of Chemistry journal article supplement (doi:10.1039/c8tb02520g), 2004-01-01
Supplement: c8tb02520g1.pdf [file c8tb02520g1.pdf]

## Supplementary Materials

for

### **Designing Multifunctionalized Selenium Nanoparticles to Reverse Oxidative Stress-Induced Spinal Cord Injury by Attenuating ROS Overproduction and Mitochondria Dysfunction.**

Siyuan Rao<sup>a†</sup>, Yongpeng Lin<sup>b†</sup>, Yanxin Du<sup>b†</sup>, Lizhen He<sup>c</sup>, Guanning Huang<sup>c</sup>, Bolai Chen<sup>b\*</sup>,  
Tianfeng Chen<sup>c\*</sup>

## Results:

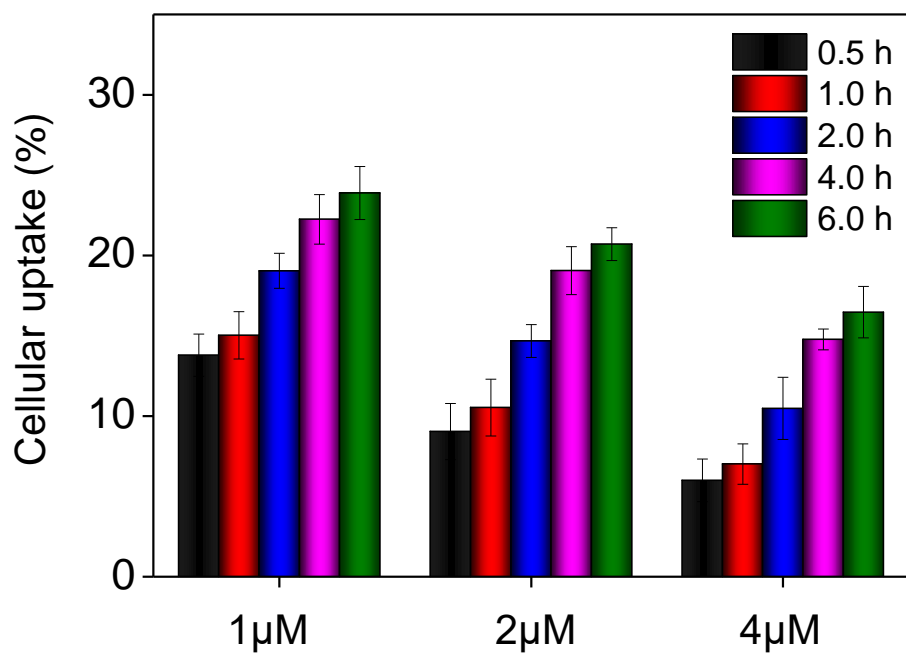

**Figure S1.** Time- and dose-dependent cellular uptake efficiency of coumarin-6-loaded SeNPs by PC12 cells after 0.5, 1.0, 2.0, 4.0 and 6.0 h of incubation, respectively. Values expressed are means  $\pm$  SD of triplicate.

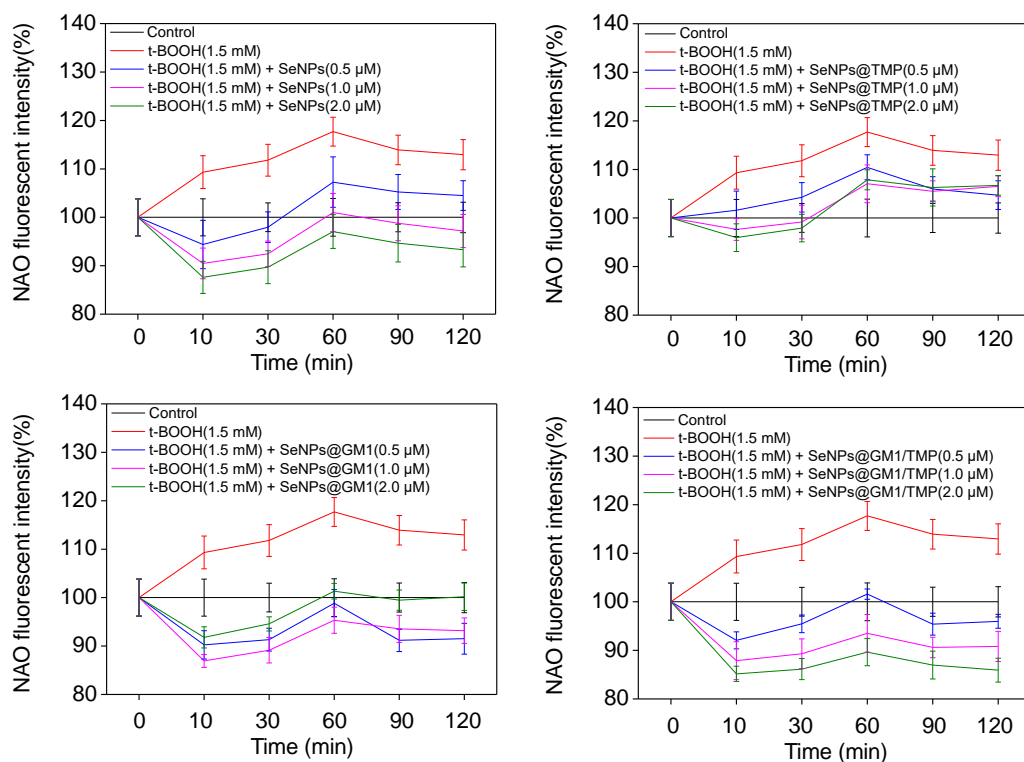

**Figure S2.** The intensity of NAO determined at 495/519 nm by using a microplate reader (Spectra Max M5).

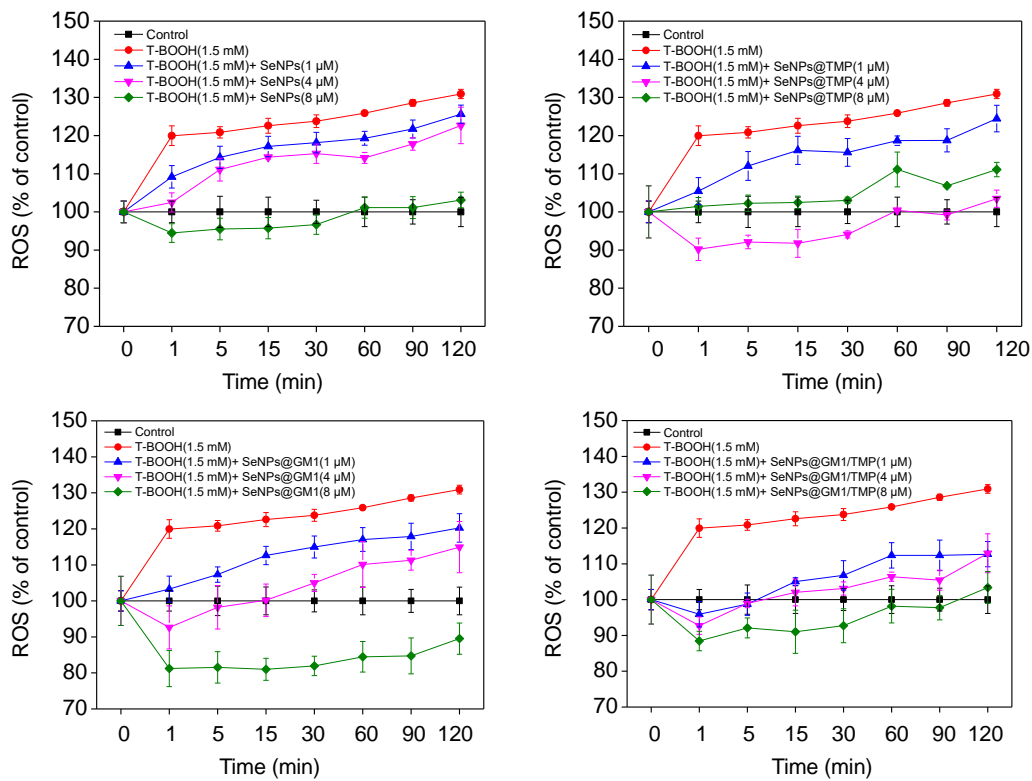

**Figure S3.** Changes in intracellular ROS generation in PC12 cells pre-incubated with different concentrations of SeNPs, SeNPs@TMP, SeNPs@GM1 and SeNPs@GM1/TMP respectively for 2 h and then exposed to 1.5 mM t-BOOH after cells stained with DHE for 30 min.
